# Supplementary material for: Enterotoxin- and Antibiotic-Resistance-Encoding Genes Are Present in Both Coagulase-Positive and Coagulase-Negative Foodborne Staphylococcus Strains
Source: MDPI journal article supplement (doi:10.3390/applmicrobiol2020028), 2022-06-10
Supplement: s1 [file s1]

## Supplementary information

**Table S1** – Reference 16S rRNA sequences' accession numbers from NCBI RefSeq RNA

| Species                                        | Accession number |
|------------------------------------------------|------------------|
| <i>Staphylococcus arlettae</i> ATCC 43957      | NR_024664.1      |
| <i>Staphylococcus aureus</i> ATCC 12600        | NR_118997.2      |
| <i>Staphylococcus gallinarum</i> VIII1         | NR_036903.1      |
| <i>Staphylococcus haemolyticus</i> SM 131      | NR_036955.1      |
| <i>Staphylococcus hominis</i> DM 122           | NR_036956.1      |
| <i>Staphylococcus nepalensis</i> CW1           | NR_028996.1      |
| <i>Staphylococcus pasteurii</i> ATCC 51129     | NR_024669.1      |
| <i>Staphylococcus saprophyticus</i> ATCC 15305 | NR_074999.2      |
| <i>Staphylococcus ureilyticus</i> CK27         | NR_037046.1      |
| <i>Staphylococcus warneri</i> AW 25            | NR_025922.1      |
| <i>Staphylococcus xylosus</i> KL 162           | NR_036907.1      |
| <i>Mammaliicoccus sciuri</i> DSM 20345         | NR_025520.1      |
| <i>Macrococcus caseolyticus</i> ATCC 13548*    | NR_119262.1      |

\*Outgroup

**Table S2.** Prevalence of multidrug resistance in in coagulase positive (CPS) and coagulase negative (CNS) Staphylococcus isolates

| Type of resistance         | Group of Antibiotics               | Number of isolates (%) |                   |
|----------------------------|------------------------------------|------------------------|-------------------|
|                            |                                    | CPS                    | CNS               |
| <b>Multi resistant</b>     | FPX, AMP, MET, VANC, PEN, TET, ERY | 1                      |                   |
|                            | FOX, AMP, MET, VANC, PEN, ERY      | 1                      |                   |
|                            | FOX, AMP, MET, VANC, PEN           | 2                      |                   |
|                            | FOX, MET, PEN                      | 1                      |                   |
|                            | FOX, AMP, MET, PEN, CHL, TET       |                        | 1                 |
|                            | FOX, MET, VANC, PEN, TET, ERY      |                        | 1                 |
|                            | FOX, MET, VANC, PEN, ERY           |                        | 2                 |
|                            | FOX, AMP, MET, PEN, ERY            |                        | 1                 |
|                            | FOX, AMP, MET, PEN, SXT            |                        | 1                 |
|                            | FOX, MET, PEN, ERY                 |                        | 8                 |
|                            | FOX, MET, VANC, PEN                |                        | 3                 |
|                            | FOX, MET, PEN, GEN                 |                        | 1                 |
|                            | FOX, MET, PEN, SXT                 |                        | 1                 |
|                            | FOX, MET, PEN, CHL                 |                        | 1                 |
|                            | AMP, PEN, GEN, ERY                 |                        | 1                 |
|                            | VANC, PEN, ERY                     |                        | 7                 |
| <b>Total</b>               |                                    | <b>5 (26.3%)</b>       | <b>28 (59.6%)</b> |
| <b>Non multi resistant</b> | AMP, PEN                           | 1                      |                   |
|                            | PEN, ERY                           | 1                      | 6                 |
|                            | ERY                                | 1                      |                   |
|                            | VANC                               | 1                      |                   |
|                            | PEN                                | 6                      | 10                |
| <b>Total</b>               |                                    | <b>10 (52.6%)</b>      | <b>16 (34%)</b>   |
